# Supplementary material for: Three-Dimensional Morphological Characteristics of Lower Lumbar Intervertebral Foramen with Age
Source: Hindawi journal article supplement (doi:10.1155/2018/8157061), 2018-11-11
Supplement: f1 [file 8157061.f1.pdf]

This is raw statistical data involved in the study.

R:Right side L:Left side

| Parameter   | Level   | Slice   | 1R     | 2R     | 3R     | 4R     | 5R     | 6R    | 7R    | 8R     | 9R     | 10R    | 1L     | 2L     | 3L     | 4L     | 5L     | 6L     | 7L     | 8L     | 9L     | 10L    |      |
|-------------|---------|---------|--------|--------|--------|--------|--------|-------|-------|--------|--------|--------|--------|--------|--------|--------|--------|--------|--------|--------|--------|--------|------|
| P-SAP       | L3/4    | mtranc  | 15.67  | 15.06  | 22.4   | 15.87  | 20.65  | 18.28 | 13.24 | 15.18  | 17.72  | 15.59  | 13.9   | 14.66  | 17.42  | 12.7   | 20.12  | 18.28  | 13.57  | 18.37  | 18.88  | 14.45  |      |
|             |         | id-slic | 11.67  | 11.57  | 19.02  | 11.31  | 16.69  | 14.57 | 8.98  | 11.54  | 11.73  | 13.02  | 11.32  | 14.25  | 14.5   | 9.21   | 15.56  | 14.57  | 12.41  | 13.38  | 16.21  | 12.3   |      |
|             |         | exit    | 10.08  | 11.73  | 15.11  | 9.23   | 14.51  | 13.12 | 12.44 | 15.02  | 11.06  | 12.73  | 9.37   | 13.12  | 14.38  | 8.82   | 15.58  | 13.12  | 11.69  | 13.72  | 13.58  | 12.17  |      |
|             |         | mtranc  | 20.45  | 12.67  | 22.25  | 17.66  | 19.39  | 20.6  | 14.36 | 10.99  | 9.06   | 17.64  | 16.93  | 20.77  | 15.53  | 16.21  | 22.46  | 20.6   | 17.29  | 16.1   | 14.26  | 13.66  |      |
|             | L4/5    | mtranc  | 13.1   | 10.74  | 18.24  | 11.89  | 14.25  | 15.4  | 10.94 | 10.37  | 8.22   | 13.17  | 12.95  | 15.62  | 14.4   | 9      | 15.23  | 15.4   | 12.21  | 12.43  | 10.09  | 12.12  |      |
|             |         | id-slic | 10.64  | 10.37  | 15.31  | 9.23   | 12.6   | 12.77 | 12.18 | 10.72  | 10.93  | 13.37  | 11.4   | 12.32  | 13.93  | 8.28   | 13.21  | 12.77  | 11.33  | 11.04  | 10.57  | 11.93  |      |
|             |         | exit    | 9.12   | 12.85  | 19.65  | 12.31  | 9.7    | 14.09 | 10.63 | 10.38  | 9.97   | 13.47  | 10.31  | 21.89  | 10.34  | 11.01  | 15.16  | 14.09  | 16.35  | 15.05  | 15.52  | 10.06  |      |
|             |         | mtranc  | 7.97   | 11.6   | 10.99  | 9.06   | 10.87  | 10.27 | 9.36  | 10.05  | 11.28  | 10.66  | 8.67   | 12.46  | 7.98   | 8.7    | 9.47   | 10.27  | 11.81  | 10.43  | 12.66  | 10.94  |      |
|             | L5S1    | id-slic | 12.07  | 11.11  | 11.6   | 11.41  | 12.67  | 10.79 | 9.48  | 12     | 14.41  | 9.94   | 12.04  | 12.71  | 10.24  | 10.53  | 11.97  | 10.79  | 10.19  | 11.48  | 13.07  | 11.31  |      |
|             |         | exit    | 6.38   | 9.08   | 8.86   | 8.28   | 12.43  | 9.61  | 6.13  | 11.97  | 7.77   | 9.16   | 5.7    | 9.69   | 8.76   | 8.71   | 12.74  | 9.61   | 6.38   | 11.2   | 9.24   | 9.27   |      |
|             |         | mtranc  | 4.92   | 9.56   | 9.37   | 8.12   | 11.77  | 12.21 | 6.66  | 12.19  | 7.09   | 7.4    | 8.64   | 12.21  | 11.76  | 8.17   | 11.36  | 12.21  | 7      | 11.86  | 9.63   | 10.38  |      |
|             |         | id-slic | 5.86   | 12.85  | 9.99   | 10.09  | 11.11  | 11.8  | 7.4   | 15.03  | 9.32   | 6.44   | 8.98   | 10.8   | 12.44  | 8.24   | 11.38  | 11.8   | 6.82   | 14.41  | 11.05  | 9.85   |      |
|             | IPV-SAP | mtranc  | 6.91   | 9.77   | 8.6    | 8.45   | 9.12   | 9.16  | 6.2   | 11.05  | 9.6    | 7.73   | 5.97   | 9.15   | 7.96   | 7.3    | 11.06  | 9.16   | 5.89   | 9.96   | 7.62   | 9.43   |      |
|             |         | L4/5    | mtranc | 6.57   | 11.26  | 11.04  | 8.74   | 9.14  | 9.07  | 7.45   | 12.43  | 9.1    | 8.81   | 6.13   | 9.57   | 10.27  | 8.47   | 8.66   | 9.07   | 5.68   | 11.07  | 9.17   | 9.66 |
|             |         | id-slic | 6.8    | 11.71  | 13.03  | 9.73   | 8.84   | 13.92 | 8.46  | 15.03  | 12     | 9.28   | 7.68   | 9.86   | 11.91  | 9.53   | 10.58  | 13.92  | 7.22   | 11.47  | 12.03  | 11.21  |      |
|             |         | exit    | 7.79   | 11.49  | 8.29   | 7.08   | 8.53   | 9.5   | 7.78  | 13.42  | 12.35  | 6.59   | 8.92   | 9.07   | 8.82   | 5.9    | 6.36   | 9.5    | 7.07   | 12.16  | 13.06  | 9.38   |      |
|             | L5S1    | mtranc  | 13.73  | 14.35  | 10     | 10.17  | 11.92  | 11.59 | 11.84 | 16.04  | 15.55  | 8.15   | 11.42  | 10.37  | 11.75  | 8.83   | 9.91   | 11.59  | 8.25   | 13.87  | 13.38  | 12.3   |      |
|             |         | id-slic | 20.24  | 15.91  | 15.48  | 15.48  | 16.51  | 16.88 | 13.93 | 21.11  | 20.51  | 9.16   | 19.35  | 17     | 18.91  | 16.15  | 17.55  | 16.88  | 13.18  | 16.18  | 18.47  | 13.52  |      |
|             |         | exit    | 15.19  | 13.42  | 18.32  | 14.55  | 11.61  | 14.23 | 11.78 | 13.47  | 17.91  | 14.46  | 10.16  | 14.23  | 13.14  | 11.85  | 10.87  | 14.23  | 12.71  | 17.73  | 19.23  | 13.02  |      |
|             |         | mtranc  | 10.22  | 9.41   | 15.76  | 10.35  | 9.38   | 11.16 | 7.92  | 11.47  | 12.35  | 11.2   | 7.97   | 11.16  | 10.41  | 8.7    | 8.63   | 11.16  | 11.31  | 12.66  | 15.93  | 9.89   |      |
| P-IV        | L3/4    | mtranc  | 8.89   | 9.79   | 13.05  | 9.45   | 8.64   | 11.18 | 11.93 | 13.6   | 10.46  | 10.24  | 7.09   | 11.02  | 9.75   | 8.55   | 8.94   | 11.18  | 10.54  | 11.74  | 11.62  | 9.16   |      |
|             | id-slic | 18.38   | 11.04  | 19.34  | 18.72  | 14.88  | 16.73  | 14.26 | 11.46 | 11.02  | 16.15  | 14.19  | 18.45  | 13.1   | 13.84  | 14.03  | 16.73  | 17.25  | 17.29  | 16.35  | 10.49  |        |      |
|             | exit    | 11      | 10.54  | 15     | 11.18  | 10.63  | 13.44  | 10.11 | 10.16 | 9.67   | 12.3   | 10.57  | 14.17  | 10.34  | 10.9   | 11.52  | 13.44  | 13.86  | 14.26  | 12.16  | 8.79   |        |      |
|             | mtranc  | 9.12    | 9.25   | 11.83  | 10.27  | 8.57   | 11.31  | 11.98 | 11.74 | 9.74   | 11.82  | 9.55   | 12.05  | 9.62   | 8.61   | 9.26   | 11.31  | 11.74  | 11.38  | 11.64  | 9.18   |        |      |
| Young Group | L4/5    | mtranc  | 11.91  | 12.76  | 16.8   | 13.17  | 7.87   | 13.78 | 12.01 | 12.94  | 11.62  | 14.23  | 13.21  | 20.32  | 13.25  | 13.19  | 16.82  | 13.78  | 15.61  | 19.21  | 18.19  | 10.26  |      |
|             | id-slic | 8.1     | 9.41   | 12.8   | 10.29  | 9.84   | 11.67  | 9.41  | 10.45 | 10.54  | 11.34  | 9.15   | 13.61  | 11.36  | 9.06   | 12.19  | 11.67  | 13.57  | 13.35  | 13.57  | 10.26  |        |      |
|             | exit    | 8.31    | 9.85   | 12.36  | 8.84   | 7.01   | 10.42  | 9.92  | 11.46 | 9.18   | 9.93   | 7.77   | 10.09  | 12.2   | 8.49   | 9.57   | 10.42  | 10.74  | 10.47  | 11.05  | 9.74   |        |      |
|             | mtranc  | 5.79    | 5.37   | 5.94   | 4.23   | 6.76   | 4.91   | 3.47  | 6.63  | 4.92   | 3.98   | 6.9    | 5.06   | 5.34   | 3.88   | 6.61   | 4.56   | 4.39   | 6.41   | 4.11   | 4.21   |        |      |
| DH          | L3/4    | mtranc  | 5.51   | 6.16   | 5.57   | 4.38   | 6.45   | 5.12  | 4.18  | 5.75   | 5.97   | 4.65   | 6.27   | 5.33   | 5.69   | 4.23   | 7.24   | 6.61   | 4.22   | 6.63   | 4.97   | 4.43   |      |
|             | id-slic | 6.9     | 6.5    | 5.93   | 4.8    | 7.56   | 5.57   | 4.56  | 6.18  | 6.98   | 5.98   | 6.48   | 5.55   | 5.95   | 4.02   | 8.14   | 6.67   | 3.44   | 6.16   | 5.35   | 5.76   |        |      |
|             | exit    | 5.45    | 4.37   | 4.92   | 4.38   | 4.56   | 4.39   | 3.63  | 4.71  | 3.49   | 3.98   | 6.04   | 5.93   | 5.55   | 4.02   | 6.61   | 4.71   | 3.8    | 3.91   | 2.9    | 5.32   |        |      |
|             | mtranc  | 6.79    | 5.01   | 5.24   | 4.38   | 5.21   | 5.43   | 3.75  | 3.54  | 3.83   | 5.32   | 6.05   | 5.09   | 5.08   | 4.02   | 6.62   | 5.21   | 3.57   | 4.43   | 3.18   | 4.48   |        |      |
| L4/5        | mtranc  | 7.26    | 5.76   | 5.56   | 5.41   | 7.12   | 5.73   | 4.45  | 3.49  | 4.76   | 4.91   | 7.42   | 5.61   | 6.19   | 4.98   | 7.71   | 6.86   | 4.07   | 5.34   | 4.73   | 4.67   |        |      |
|             | id-slic | 3.57    | 3.41   | 3.89   | 3.01   | 4.6    | 2.67   | 2.89  | 3.67  | 3.53   | 3.37   | 3.63   | 3.79   | 4.28   | 2.91   | 4.92   | 4.39   | 3.08   | 3.99   | 3.63   | 3.55   |        |      |
|             | exit    | 3.83    | 3.75   | 4.63   | 3.76   | 4.76   | 4.21   | 2.38  | 3.58  | 3.24   | 4.56   | 4.23   | 4.28   | 4.49   | 4.97   | 5.21   | 5.71   | 3.44   | 3.27   | 3.65   | 4.3    |        |      |
|             | mtranc  | 6.88    | 6.39   | 7.12   | 6.26   | 5.97   | 5.18   | 5.03  | 3.27  | 3.78   | 5.25   | 5.98   | 6.14   | 7.31   | 6.05   | 6.47   | 7.31   | 3.69   | 5.71   | 4.85   | 4.51   |        |      |
| BBA         | L5S1    | mtranc  | 205.2  | 211    | 261.8  | 179.9  | 240.5  | 262.7 | 163   | 235.2  | 205.2  | 166.6  | 228.4  | 211.6  | 247.3  | 184.3  | 257.7  | 262.72 | 157.59 | 249.58 | 228.43 | 173.06 |      |
|             | id-slic | 159.4   | 195.4  | 222    | 132.1  | 195.1  | 232.2  | 106.1 | 115.2 | 59.4   | 146.4  | 139.4  | 211.2  | 211.2  | 251    | 152    | 221.9  | 232.18 | 137.27 | 225.14 | 211.22 | 150.88 |      |
|             | exit    | 216     | 234.9  | 219.5  | 143.1  | 203.3  | 223    | 199.3 | 5.95  | 216    | 146.5  | 196.7  | 236.7  | 251.8  | 154.7  | 236.8  | 222.95 | 133.2  | 231.74 | 196.65 | 164.52 |        |      |
|             | mtranc  | 198.88  | 203.24 | 216.01 | 198.88 | 175.05 | 281.7  | 154.1 | 158.7 | 150.41 | 194.81 | 163.6  | 236.47 | 204.94 | 163.6  | 227.85 | 281.69 | 182.44 | 192.34 | 158.99 | 170.74 |        |      |
| SP-IFE      | L4/5    | mtranc  | 147.01 | 213.81 | 208.85 | 147.01 | 155.15 | 233.3 | 119.9 | 155    | 142.31 | 158.32 | 124.63 | 203.74 | 203.13 | 124.63 | 161.62 | 233.34 | 138.25 | 177.67 | 135.34 | 155.97 |      |
|             | id-slic | 147.78  | 216.97 | 219.2  | 147.78 | 173.57 | 271.3  | 174.2 | 12.39 | 149.2  | 147.36 | 130.87 | 175.89 | 216.91 | 130.87 | 199.95 | 271.3  | 144.17 | 171.78 | 145.47 | 157.43 |        |      |
|             | exit    | 187.7   | 189    | 204    | 121.1  | 139.2  | 187.7  | 134.7 | 142.2 | 164.8  | 159.3  | 187.7  | 216.7  | 150    | 104.9  | 172.3  | 187.69 | 177    | 174.39 | 190.03 | 147.62 |        |      |
|             | mtranc  | 168     | 176.8  | 158.8  | 112.9  | 152.1  | 168    | 124   | 151.2 | 179.9  | 133.8  | 168    | 151.1  | 158.9  | 97.64  | 156.9  | 167.96 | 152.05 | 148.61 | 194.3  | 170.65 |        |      |
| IPV-SAP     | L3/4    | mtranc  | 205.7  | 259.5  | 211.8  | 149.4  | 169.3  | 205.7 | 170.3 | 183    | 199.1  | 142.1  | 205.7  | 215.5  | 213.8  | 166.9  | 177.7  | 205.68 | 162.76 | 152.02 | 206.33 | 181.34 |      |
|             | id-slic | 12.02   | 16.67  | 20.13  | 15     | 18.18  | 18.62  | 14.97 | 15.03 | 16.1   | 14.92  | 13.57  | 16.59  | 19.08  | 14.48  | 17.88  | 18.78  | 15.68  | 15.74  | 15.12  | 18.01  |        |      |
|             | exit    | 9.31    | 14.94  | 16.43  | 12.55  | 15.71  | 15.01  | 13.54 | 13.28 | 14.25  | 12.53  | 12.04  | 14.39  | 16.43  | 12.99  | 15.97  | 14.2   | 12.85  | 13.84  | 14.73  | 15.45  |        |      |
|             | mtranc  | 9.69    | 13.21  | 13.29  | 11.03  | 12.08  | 12.53  | 12.48 | 12.31 | 11.41  | 11.23  | 11.63  | 13.25  | 14.83  | 12.53  | 13.94  | 13.02  | 11.34  | 12.57  | 12.39  | 12.6   |        |      |
| P-SAP       | L3/4    | mtranc  | 13.44  | 18     | 11.58  | 19.64  | 26.67  | 11.75 | 19.5  | 19.86  | 18.52  | 19.23  | 10.62  | 19.71  | 23.32  | 16.98  | 18.45  | 19.63  | 16.55  | 16.52  |        |        |      |
|             |         | id-slic | 10.32  | 13.09  | 10.11  | 17.18  | 20.95  | 11.03 | 12.8  | 14.05  | 10.59  | 12.71  | 7.92   | 18.03  | 21.01  | 12.74  | 12.63  | 15.76  | 11.39  | 15.32  |        |        |      |
|             |         | exit    | 9.13   | 13.21  | 10.88  | 12.27  | 16.11  | 10.63 | 13.62 | 11.47  | 8.59   | 11.98  | 8.24   | 12.71  | 16.97  | 10.97  | 10.6   | 12.62  | 11.02  | 14.12  |        |        |      |
|             |         | mtranc  | 13.62  | 19.81  | 10.91  | 23.04  | 16.33  | 12.59 | 13.9  | 14.6   | 16.11  | 14.12  | 15.64  | 8.82   | 15.82  | 25.15  | 10.96  | 17.46  | 16.2   | 17.26  |        |        |      |
|             | L4/5    | mtranc  | 10.52  | 13.52  | 9.2    | 15.8   | 14.63  | 11.52 | 10.53 | 12.62  | 11.89  | 12.25  | 11.19  | 8.46   | 12.25  | 21.64  | 11.43  | 13.02  | 12.77  | 11.92  |        |        |      |
|             |         | id-slic | 10.94  | 12.12  | 12.4   | 11.8   | 14.28  | 11.34 | 11.12 | 12.38  | 13.9   | 11.75  | 11.85  | 7.79   | 12.25  | 17.31  | 11.03  | 12.35  | 10.81  | 14.8   |        |        |      |
|             |         | exit    | 15.07  | 15.74  | 12.55  | 12.7   | 15.74  | 11.45 | 9.61  | 12.9   | 11.8   | 14.99  | 10.16  | 7.26   | 16.49  | 21.13  | 12.93  | 13.44  | 11.58  | 14.33  |        |        |      |
|             |         | mtranc  | 12.48  | 8.57   | 6.88   | 10.37  | 16.38  | 10.25 | 9.92  | 8.85   | 13.03  | 10.83  | 9.69   | 9.38   | 9.68   | 14.75  | 6.76   | 8.74   | 8.6    | 10.38  |        |        |      |
|             | L5S1    | id-slic | 11.92  | 12.9   | 12.22  | 13.44  | 15.23  | 12.78 | 11.79 | 10.68  | 12.4   | 11.49  | 14.27  | 13.61  | 11.64  | 15.35  | 9.39   | 11.55  | 12.51  | 9      |        |        |      |
|             |         | exit    | 6.35   | 8.4    | 8.34   | 7.02   | 11.04  | 6     | 10.27 | 8.35   | 7.95   | 7.82   | 9.78   | 7.4    | 8.79   | 9.82   | 7.64   | 10.03  | 9.07   | 7.92   |        |        |      |
|             |         | mtranc  | 5.12   | 7.98   | 9.33   | 7.66   | 10     | 6.29  | 9.63  | 7.58   | 7.5    | 6.94   | 8.96   | 9.45   | 8.81   | 8.96   | 6.12   | 11.06  | 7.97   | 8.09   |        |        |      |
|             |         |         |        |        |        |        |        |       |       |        |        |        |        |        |        |        |        |        |        |        |        |        |      |

|  |                 |         |         |        |        |        |        |        |       |       |        |        |        |        |        |        |        |        |        |        |
|--|-----------------|---------|---------|--------|--------|--------|--------|--------|-------|-------|--------|--------|--------|--------|--------|--------|--------|--------|--------|--------|
|  |                 | exit    | 14.07   | 19.44  | 20.55  | 19.87  | 13.52  | 17.68  | 16.26 | 16.7  | 19.93  | 18.18  | 22.12  | 19.57  | 16.57  | 16.86  | 16.84  | 18.05  | 18.39  | 13.34  |
|  |                 | mtranc  | 13.65   | 13.56  | 14.8   | 19.69  | 19.28  | 9.55   | 14.11 | 18.18 | 15.53  | 16.03  | 14.83  | 13.57  | 15.66  | 19.6   | 15.75  | 14.58  | 16.44  | 13.38  |
|  | L3/4            | id-slic | 9.81    | 9.67   | 9.59   | 15.48  | 14.36  | 9.69   | 10.19 | 11.37 | 8.3    | 10.12  | 10.69  | 11.24  | 11.71  | 17.76  | 10.84  | 9.77   | 13.29  | 9.11   |
|  |                 | exit    | 8.43    | 9.18   | 9.04   | 12.61  | 12.26  | 9.69   | 10.89 | 9.27  | 13.38  | 9.22   | 9.54   | 10.28  | 9.88   | 14.37  | 10.61  | 11.28  | 11.02  | 9.77   |
|  |                 | mtranc  | 12.09   | 17.49  | 14.51  | 18.72  | 12.74  | 10.97  | 13.29 | 13.13 | 14.81  | 13.03  | 9.81   | 11.8   | 13.64  | 20.62  | 16.14  | 16.23  | 16.44  | 15.64  |
|  | P-IV            | L4/5    | id-slic | 10.04  | 12.6   | 9.6    | 15.42  | 10.87  | 10.22 | 10.03 | 11.91  | 8.55   | 9.63   | 9.36   | 11.69  | 11.86  | 18.39  | 11.53  | 11.98  | 10.79  |
|  |                 | exit    | 10.99   | 11.15  | 13.22  | 12.3   | 10.36  | 10.2   | 10.37 | 10.53 | 10.41  | 10.41  | 9.47   | 10.21  | 10.19  | 14.27  | 10.85  | 11.57  | 10.86  | 10.81  |
|  |                 | mtranc  | 15.22   | 16.42  | 15.44  | 12.78  | 14.08  | 12.43  | 10.7  | 13.87 | 9.76   | 14.75  | 12.33  | 11.21  | 20.18  | 19.52  | 15.97  | 15.22  | 13.28  | 12.29  |
|  |                 | L5S1    | id-slic | 10.21  | 10.17  | 10.06  | 9.85   | 12.66  | 9.72  | 7.2   | 8.41   | 8.32   | 9.82   | 9.37   | 11.22  | 13.45  | 16.09  | 10.21  | 9.47   | 10.91  |
|  |                 | exit    | 10.29   | 9.78   | 11.23  | 9.05   | 11.83  | 8.86   | 6.63  | 9.46  | 9.4    | 9      | 7.3    | 9.54   | 10.1   | 11     | 7.51   | 8.45   | 8.44   | 10.06  |
|  |                 | mtranc  | 3.96    | 4.67   | 5.15   | 5.44   | 5.64   | 4.8    | 5.01  | 5.67  | 4.79   | 5.51   | 5.32   | 4.68   | 5.9    | 5.83   | 3.89   | 4.52   | 5.93   | 4.07   |
|  | L3/4            | id-slic | 5.53    | 4.37   | 5.05   | 5.89   | 6.34   | 3.77   | 4.2   | 5.29  | 5.13   | 5.37   | 4.67   | 5.61   | 5.93   | 5.29   | 4.23   | 4.05   | 5.42   | 4.28   |
|  |                 | exit    | 5.57    | 5.01   | 6.55   | 6.25   | 7.13   | 4.04   | 4.68  | 6.07  | 4.95   | 7.27   | 5.16   | 6.42   | 6.45   | 5.78   | 4.53   | 4.87   | 5.32   | 5.72   |
|  |                 | mtranc  | 4.88    | 4.87   | 4.04   | 5.37   | 6.49   | 5.04   | 3.73  | 5.73  | 4.72   | 6.37   | 5.49   | 3.76   | 6.3    | 6.97   | 6.11   | 4.11   | 5.29   | 4.82   |
|  | DH              | L4/5    | id-slic | 5.51   | 5.18   | 4.85   | 6.59   | 6.28   | 4.93  | 3.98  | 5.81   | 5.29   | 6.22   | 5.26   | 4.64   | 5.81   | 6.96   | 6.6    | 3.45   | 5.08   |
|  |                 | exit    | 6.55    | 5.02   | 5.31   | 7.12   | 6.46   | 5.83   | 5.6   | 6.33  | 5.44   | 7.13   | 5.93   | 4.96   | 6.95   | 8.33   | 7.54   | 3.99   | 5.17   | 6.38   |
|  |                 | mtranc  | 4.51    | 3.69   | 4.46   | 3.73   | 5.6    | 3.14   | 0.5   | 2.76  | 3.28   | 4.85   | 3.1    | 4.01   | 3.98   | 6.56   | 2.73   | 1.49   | 2.07   | 3.79   |
|  |                 | L5S1    | id-slic | 4.73   | 3.08   | 4.12   | 4.33   | 5.53   | 2.9   | 1.03  | 3.82   | 3.46   | 4.47   | 3.51   | 3.67   | 4.03   | 6.44   | 2.98   | 1.05   | 3.06   |
|  |                 | exit    | 5       | 5.4    | 4.29   | 6.15   | 5.27   | 4.17   | 1.97  | 4.32  | 4.2    | 5.17   | 6.6    | 4.12   | 6.19   | 6.88   | 4.01   | 2.35   | 5.03   | 4.6    |
|  |                 | mtranc  | 145     | 175.2  | 130.9  | 189.7  | 241.4  | 130.2  | 165.2 | 190.4 | 164.5  | 185.8  | 194    | 142    | 205.3  | 236.3  | 154.9  | 154.17 | 202.84 | 176.52 |
|  | L3/4            | id-slic | 123.1   | 139.4  | 117.3  | 181.5  | 216.4  | 124.7  | 134.2 | 149.3 | 155.4  | 124.3  | 155.3  | 123.3  | 195.2  | 197.7  | 131.9  | 145.38 | 183.9  | 139.54 |
|  |                 | exit    | 129.4   | 168.4  | 126.8  | 182.7  | 206.8  | 137    | 200   | 180.2 | 304.2  | 173.9  | 166.2  | 132.4  | 196.9  | 198.1  | 180.2  | 227.63 | 161.91 | 236    |
|  |                 | mtranc  | 142.43  | 178.82 | 108.28 | 187.33 | 147    | 151    | 143.1 | 152.3 | 170.46 | 151.25 | 160.13 | 112.19 | 173.55 | 207.54 | 140.37 | 154.55 | 174.96 | 190.56 |
|  | BBA             | L4/5    | id-slic | 119.74 | 145.42 | 99.69  | 159.83 | 155.66 | 168   | 110.6 | 144.4  | 157.5  | 136.24 | 141.17 | 114.68 | 171.52 | 184.1  | 156.78 | 120.98 | 151.64 |
|  |                 | exit    | 145.37  | 151.33 | 217.17 | 174.34 | 157.64 | 215.2  | 186.2 | 176.9 | 276.3  | 192.08 | 161.57 | 120.38 | 190.22 | 165.37 | 201.06 | 132.31 | 167    | 227.77 |
|  |                 | mtranc  | 175.3   | 161.5  | 120.1  | 145.5  | 197.1  | 134.2  | 117.1 | 147.7 | 168.1  | 172.5  | 147    | 105.2  | 171.6  | 220.1  | 111.9  | 136.28 | 138.22 | 165.53 |
|  |                 | L5S1    | id-slic | 133.8  | 143.9  | 94.03  | 142.1  | 195.9  | 134.9 | 107.9 | 98.55  | 191.8  | 146.8  | 143.7  | 112.1  | 154    | 206.9  | 104    | 96.61  | 116.79 |
|  |                 | exit    | 171.1   | 191.8  | 205.3  | 188.9  | 206.3  | 163.6  | 112.8 | 139   | 238.5  | 209.4  | 238.1  | 173.4  | 170    | 250.4  | 141    | 147.11 | 145.76 | 187.26 |
|  |                 | mtranc  | 16.63   | 13.04  | 13.41  | 17.4   | 16.73  | 15.25  | 12.98 | 13.79 | 15.96  | 15.52  | 14.73  | 14.39  | 14.52  | 16.87  | 14.39  | 13.38  | 14.18  | 14.61  |
|  | SP-IFE          | L3/4    | 14.2    | 11.91  | 11.01  | 14.35  | 13.69  | 14.82  | 12.58 | 13.76 | 12.14  | 15.26  | 12.14  | 12.14  | 15.13  | 13.12  | 14.74  | 13.02  | 13.79  | 12.37  |
|  |                 | L5S1    | 11.88   | 11.01  | 10.34  | 12.9   | 13.12  | 13.71  | 12.19 | 12.22 | 11.92  | 10.97  | 10.79  | 11.72  | 13.35  | 12.36  | 12.99  | 11.98  | 11.8   | 13.26  |
|  | Parameter Level | Slice   | 1R      | 2R     | 3R     | 4R     | 5R     | 6R     | 1L    | 2L    | 3L     | 4L     | 5L     | 6L     |        |        |        |        |        |        |
|  |                 | mtranc  | 12.78   | 13.16  | 17.88  | 11.11  | 14.5   | 22.09  | 15.34 | 17.26 | 9.74   | 11.49  | 18.74  | 18.46  |        |        |        |        |        |        |
|  | L3/4            | id-slic | 10.32   | 11.57  | 14.42  | 6.43   | 9.92   | 10.62  | 10.11 | 13.16 | 10.18  | 7.18   | 14.34  | 12.15  |        |        |        |        |        |        |
|  |                 | exit    | 9.89    | 9.57   | 10.6   | 6.88   | 9.33   | 10.29  | 8.3   | 14.71 | 9.3    | 11.66  | 18.74  | 16.9   |        |        |        |        |        |        |
|  |                 | mtranc  | 15.23   | 15.5   | 20.4   | 14.18  | 8.25   | 16.07  | 19.31 | 18.36 | 8.73   | 14.66  | 16.53  | 13.57  |        |        |        |        |        |        |
|  | P-SAP           | L4/5    | id-slic | 9.12   | 11.45  | 13.73  | 5.71   | 7.17   | 11.7  | 12.98 | 12.67  | 6.57   | 6.88   | 12.38  | 10.48  |        |        |        |        |        |
|  |                 | exit    | 16.03   | 11.44  | 8.82   | 11.19  | 12.37  | 12.16  | 10.83 | 13.9  | 8      | 6.77   | 9.13   | 10     |        |        |        |        |        |        |
|  |                 | mtranc  | 10.99   | 11.2   | 7.49   | 7.23   | 10.17  | 10.8   | 19.11 | 17.49 | 12.59  | 12.15  | 13.58  | 15.49  |        |        |        |        |        |        |
|  |                 | L5S1    | id-slic | 9.91   | 9.53   | 7.11   | 9.86   | 13.15  | 8.01  | 10.66 | 12.69  | 6.32   | 7.98   | 9.21   | 6.21   |        |        |        |        |        |
|  |                 | exit    | 12.41   | 9.04   | 11.2   | 13.73  | 17.61  | 9.65   | 7.92  | 12.38 | 5.19   | 9.46   | 11.37  | 13.11  |        |        |        |        |        |        |
|  |                 | mtranc  | 6.12    | 5.86   | 6.69   | 7.86   | 9.1    | 9.64   | 5.62  | 9.17  | 7.45   | 8.17   | 9.83   | 11.5   |        |        |        |        |        |        |
|  | L3/4            | id-slic | 4.56    | 8.1    | 6.69   | 6.42   | 7.19   | 9.48   | 6.73  | 8.17  | 9.33   | 9.16   | 8.11   | 11.63  |        |        |        |        |        |        |
|  |                 | exit    | 5.94    | 9.05   | 6.6    | 7.12   | 9.03   | 11.34  | 7.32  | 9.82  | 7.27   | 12.39  | 9.83   | 14.91  |        |        |        |        |        |        |
|  |                 | mtranc  | 5.25    | 5.6    | 8.43   | 7.86   | 9.56   | 9.12   | 6.92  | 5.54  | 5.94   | 4.88   | 7.26   | 10.26  |        |        |        |        |        |        |
|  | IPV-SAP         | L4/5    | id-slic | 4.27   | 8.68   | 7.9    | 5.22   | 10.5   | 10.06 | 6.68  | 11.11  | 7.66   | 9.29   | 6.12   | 8.91   |        |        |        |        |        |
|  |                 | exit    | 9.47    | 12.74  | 8.69   | 10.46  | 14.65  | 12.52  | 8.55  | 14.52 | 9.54   | 8.55   | 9.34   | 12.56  |        |        |        |        |        |        |
|  |                 | mtranc  | 8.42    | 4.71   | 7.78   | 7.11   | 9.36   | 5.94   | 6.2   | 6.91  | 8.83   | 7.02   | 11.07  | 6.18   |        |        |        |        |        |        |
|  |                 | L5S1    | id-slic | 6.56   | 6.79   | 13.21  | 8.46   | 10.83  | 8.88  | 12.41 | 7.47   | 9.14   | 12.97  | 19.36  | 9.49   |        |        |        |        |        |
|  |                 | exit    | 8.18    | 11.6   | 12.59  | 16.63  | 17.07  | 19.43  | 12.37 | 9.46  | 14     | 16.92  | 22.25  | 15.44  |        |        |        |        |        |        |
|  |                 | mtranc  | 12.69   | 13.94  | 19.77  | 15.53  | 17.14  | 15.64  | 16.19 | 15.67 | 11.51  | 14.91  | 18.3   | 12.54  |        |        |        |        |        |        |
|  | L3/4            | id-slic | 10.03   | 11.69  | 15.91  | 10.9   | 12.57  | 10.54  | 11.09 | 11.32 | 12.48  | 9.75   | 16.19  | 10.18  |        |        |        |        |        |        |
|  |                 | exit    | 11.01   | 9.8    | 11.72  | 9.11   | 1.85   | 10.18  | 9.22  | 10.02 | 12.61  | 10.51  | 18.3   | 12.91  |        |        |        |        |        |        |
|  |                 | mtranc  | 13.74   | 15.07  | 21.1   | 15.53  | 13.93  | 14.99  | 17.46 | 17.9  | 13.38  | 18.71  | 19.74  | 13.65  |        |        |        |        |        |        |
|  | P-IV            | L4/5    | id-slic | 9.73   | 11.32  | 14.24  | 11.08  | 13.89  | 11.11 | 12.79 | 10.93  | 11.15  | 12.82  | 16.32  | 11.16  |        |        |        |        |        |
|  |                 | exit    | 13.73   | 11.7   | 12.87  | 12.96  | 13.68  | 10.31  | 10.93 | 12.82 | 13.21  | 10.07  | 13.24  | 11.54  |        |        |        |        |        |        |
|  |                 | mtranc  | 10.5    | 17.04  | 13.03  | 9.99   | 12.86  | 11.63  | 14.04 | 20.9  | 16.95  | 17.67  | 22.36  | 15.64  |        |        |        |        |        |        |
|  |                 | L5S1    | id-slic | 10.25  | 14.07  | 9.33   | 10.7   | 13.46  | 10.92 | 10.17 | 15.13  | 11.19  | 9.61   | 15.78  | 9.96   |        |        |        |        |        |
|  |                 | exit    | 9.49    | 11.49  | 8.85   | 10.12  | 13.08  | 10.75  | 9.23  | 13.26 | 9.82   | 10.66  | 14.13  | 10.06  |        |        |        |        |        |        |
|  |                 | mtranc  | 4.01    | 3.58   | 2.69   | 3.25   | 3.35   | 2.38   | 3.38  | 4.05  | 5.22   | 0.5    | 1.52   | 1.92   |        |        |        |        |        |        |
|  | L3/4            | id-slic | 3.66    | 4.13   | 3.11   | 3      | 2.46   | 3.16   | 4.99  | 4.02  | 5.07   | 1.54   | 2.47   | 2.71   |        |        |        |        |        |        |
|  |                 | exit    | 5.78    | 4.71   | 3.39   | 4.18   | 3.2    | 3.94   | 6.1   | 5.23  | 5.32   | 1.34   | 3.23   | 3.16   |        |        |        |        |        |        |
|  |                 | mtranc  | 3.87    | 3.49   | 4.91   | 1.27   | 1.22   | 4.54   | 2.72  | 3.63  | 4.14   | 1.02   | 3.8    | 3.73   |        |        |        |        |        |        |
|  | DH              | L4/5    | id-slic | 3.31   | 2.81   | 5.47   | 2.69   | 1.31   | 5.66  | 4.25  | 4.59   | 3.65   | 2.32   | 4.11   | 4.32   |        |        |        |        |        |
|  |                 | exit    | 4.68    | 5.57   | 6.47   | 3.91   | 1.7    | 6.23   | 5.13  | 4.36  | 4.65   | 2.12   | 4.87   | 5.98   |        |        |        |        |        |        |
|  |                 | mtranc  | 0.65    | 2.21   | 0.59   | 0.98   | 0.69   | 0.95   | 0.42  | 2.66  | 1.81   | 1.35   | 0.44   | 0.72   |        |        |        |        |        |        |
|  |                 | L5S1    | id-slic | 0.35   | 1.71   | 0.38   | 1.02   | 0.53   | 0.78  | 0.54  | 2.25   | 2.63   | 1.45   | 0.58   | 0.75   |        |        |        |        |        |
|  |                 | exit    | 0.51    | 2.6    | 0.32   | 1.55   | 0.32   | 0.71   | 0.68  | 3.05  | 3.59   | 1.8    | 0.73   | 0.84   |        |        |        |        |        |        |
|  |                 | mtranc  | 132.7   | 137    | 223.5  | 127    | 165.2  | 200.2  | 144.2 | 167.9 | 164.7  | 111.9  | 203.3  | 148.8  |        |        |        |        |        |        |

|        |              |                |        |        |        |        |       |       |       |        |        |        |        |
|--------|--------------|----------------|--------|--------|--------|--------|-------|-------|-------|--------|--------|--------|--------|
|        | L3/4 id-slic | 125.5          | 135.2  | 179    | 88.97  | 138.5  | 141   | 128.5 | 145.3 | 146.7  | 93.81  | 188.7  | 158.7  |
|        | exit         | 113.2          | 133.6  | 157.4  | 94.68  | 154.6  | 215.1 | 112.1 | 206.6 | 137.3  | 162.8  | 186.9  | 229    |
|        | ntranc       | 125.09         | 132.28 | 200.65 | 136.59 | 103.17 | 183.7 | 158.7 | 136.1 | 161.07 | 141.91 | 154.82 | 153.19 |
| BBA    | L4/5 id-slic | 115.61         | 115.34 | 190.2  | 75.04  | 94.58  | 153.8 | 141   | 138.8 | 158.91 | 93.98  | 154.43 | 143.1  |
|        | exit         | 167.32         | 207.1  | 161.93 | 170.98 | 142.38 | 242.2 | 147.9 | 234.5 | 169.83 | 104.09 | 137.08 | 203.22 |
|        | ntranc       | 111            | 121.7  | 105.5  | 78.33  | 13.72  | 115.9 | 103.9 | 146.1 | 161.3  | 127.9  | 154.3  | 137.8  |
|        | L5S1 id-slic | 130.3          | 120.3  | 92.13  | 91.89  | 138.6  | 101.1 | 103.7 | 142.2 | 160.6  | 124.7  | 157    | 136.2  |
|        | exit         | 189.4          | 138.8  | 110.7  | 121.9  | 130.7  | 122.9 | 145.3 | 144.3 | 133.1  | 144.2  | 166.8  | 152.4  |
|        | L3/4         | 13.99          | 14.42  | 16.23  | 14.33  | 17.79  | 16.34 | 12.88 | 12.88 | 16.12  | 13.48  | 17.28  | 16.69  |
| SP-IFE | L4/5         | 12.59          | 13.2   | 14.69  | 11.96  | 13.48  | 12.26 | 11.41 | 12.58 | 15.38  | 11.29  | 13.06  | 13.59  |
|        | L5S1         | 12.81          | 14.73  | 12.84  | 13.08  | 13.09  | 11.26 | 12.2  | 13.59 | 14.79  | 13.71  | 13.69  | 12.4   |
|        |              | Young Group    |        |        |        |        |       |       |       |        |        |        |        |
| Age    |              | 35             | 31     | 22     | 35     | 36     | 29    | 24    | 20    | 29     | 27     |        |        |
| Height |              | 175            | 173    | 177    | 174    | 179    | 176   | 173   | 177   | 174    | 185    |        |        |
| Weight |              | 82.5           | 70.1   | 82.2   | 76.8   | 78.5   | 83    | 70.4  | 79.6  | 83.1   | 90     |        |        |
| BMI    |              | 26.94          | 23.42  | 26.24  | 25.37  | 24.5   | 26.8  | 23.52 | 25.41 | 27.45  | 26.3   |        |        |
|        |              | Mid-aged Group |        |        |        |        |       |       |       |        |        |        |        |
| Age    |              | 47             | 50     | 40     | 49     | 50     | 49    | 51    | 43    | 50     |        |        |        |
| Height |              | 172            | 174    | 176    | 178    | 170    | 173   | 175   | 177   | 182    |        |        |        |
| Weight |              | 66             | 72.4   | 80.3   | 74.5   | 68.6   | 76.7  | 77.8  | 82.8  | 94     |        |        |        |
| BMI    |              | 22.31          | 23.91  | 25.92  | 23.51  | 23.73  | 25.63 | 25.4  | 26.43 | 28.38  |        |        |        |
|        |              | Old Group      |        |        |        |        |       |       |       |        |        |        |        |
| Age    |              | 74             | 65     | 64     | 71     | 70     | 71    |       |       |        |        |        |        |
| Height |              | 177            | 171    | 176    | 174    | 175    | 172   |       |       |        |        |        |        |
| Weight |              | 80.5           | 69.9   | 75.4   | 68.1   | 73.9   | 85.1  |       |       |        |        |        |        |
| BMI    |              | 25.7           | 23.9   | 24.7   | 22.49  | 24.13  | 28.77 |       |       |        |        |        |        |
